# Supplementary material for: Simulations of Bay of Bengal tropical cyclones in a regional convection-permitting atmosphere–ocean coupled model
Source: Copernicus journal article supplement (doi:10.5194/wcd-2021-46), 2021-07-26
Supplement: Supplementary file 1 [file wcd-2021-46-supplement.pdf]

## Supplementary Material

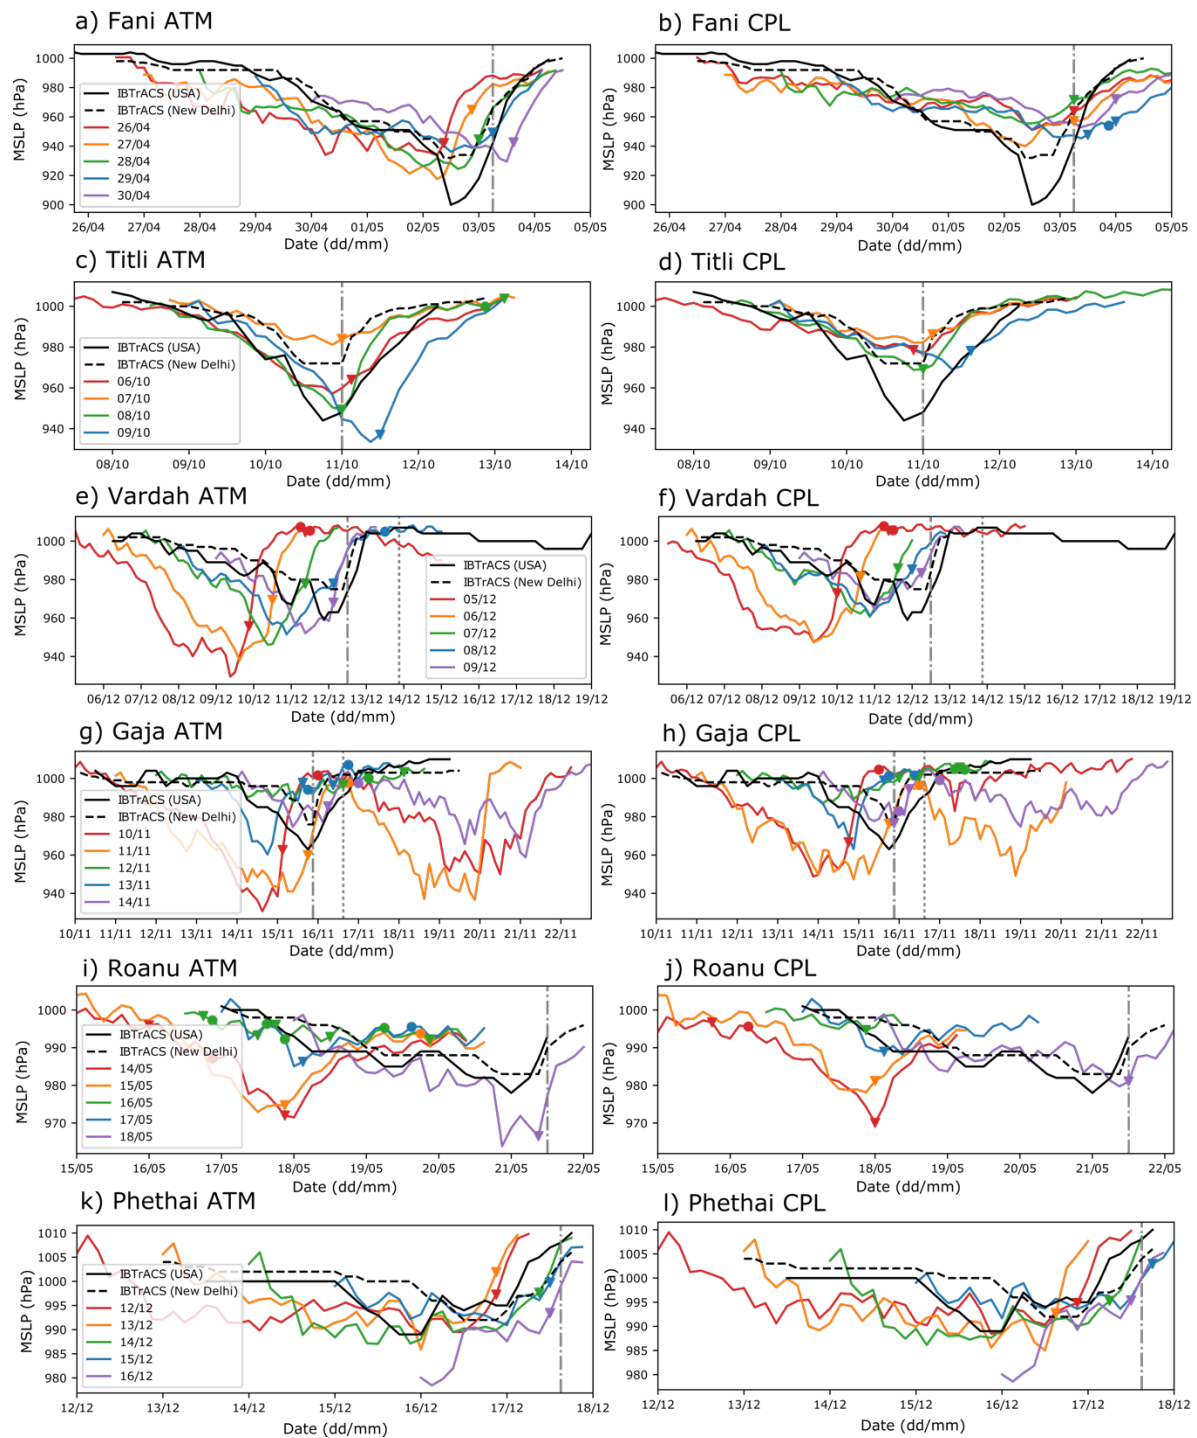

**Figure S1.** Minimum MSLP time series for ATM (left column), CPL (right column) and IBTrACS. Colours indicate initialisation date (dd/mm). Triangles indicate time of landfall; circles indicate re-emergence over the ocean. Dash-dot vertical line indicates time of landfall in IBTrACS; for Vardah and Gaja, the dotted line indicates time of re-emergence over the Arabian Sea in IBTrACS.

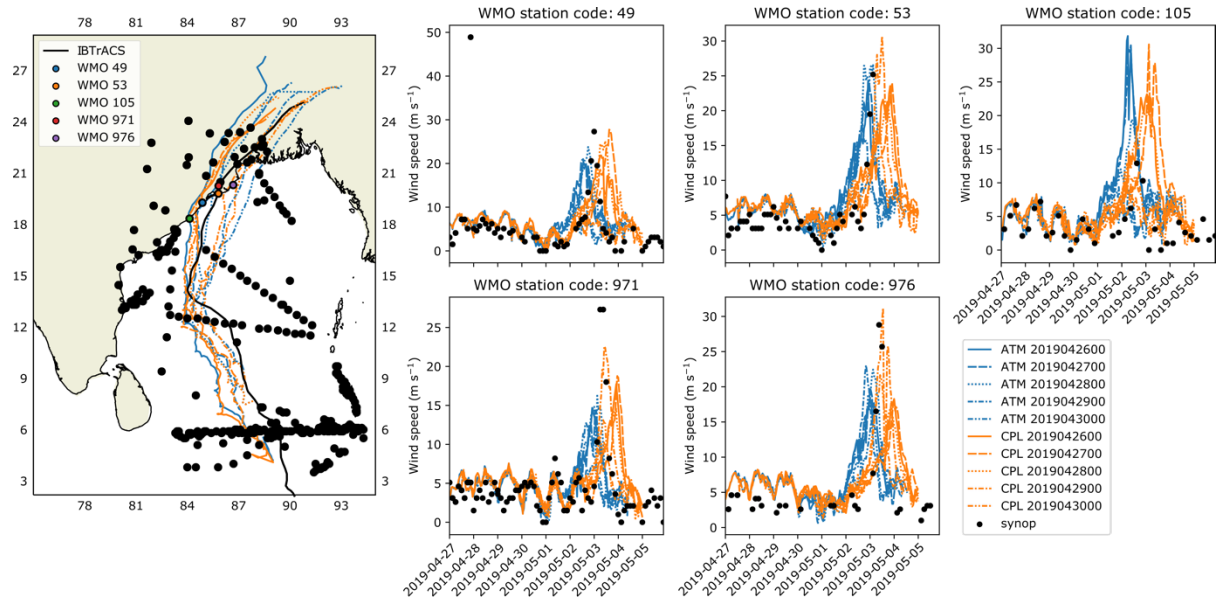

10 **Figure S2.** Location of SYNOP stations within 500 km of the track of TC Fani, used to evaluate forecasts in this study; timeseries data for selected land SYNOP stations (close to the track at point of storm landfall).

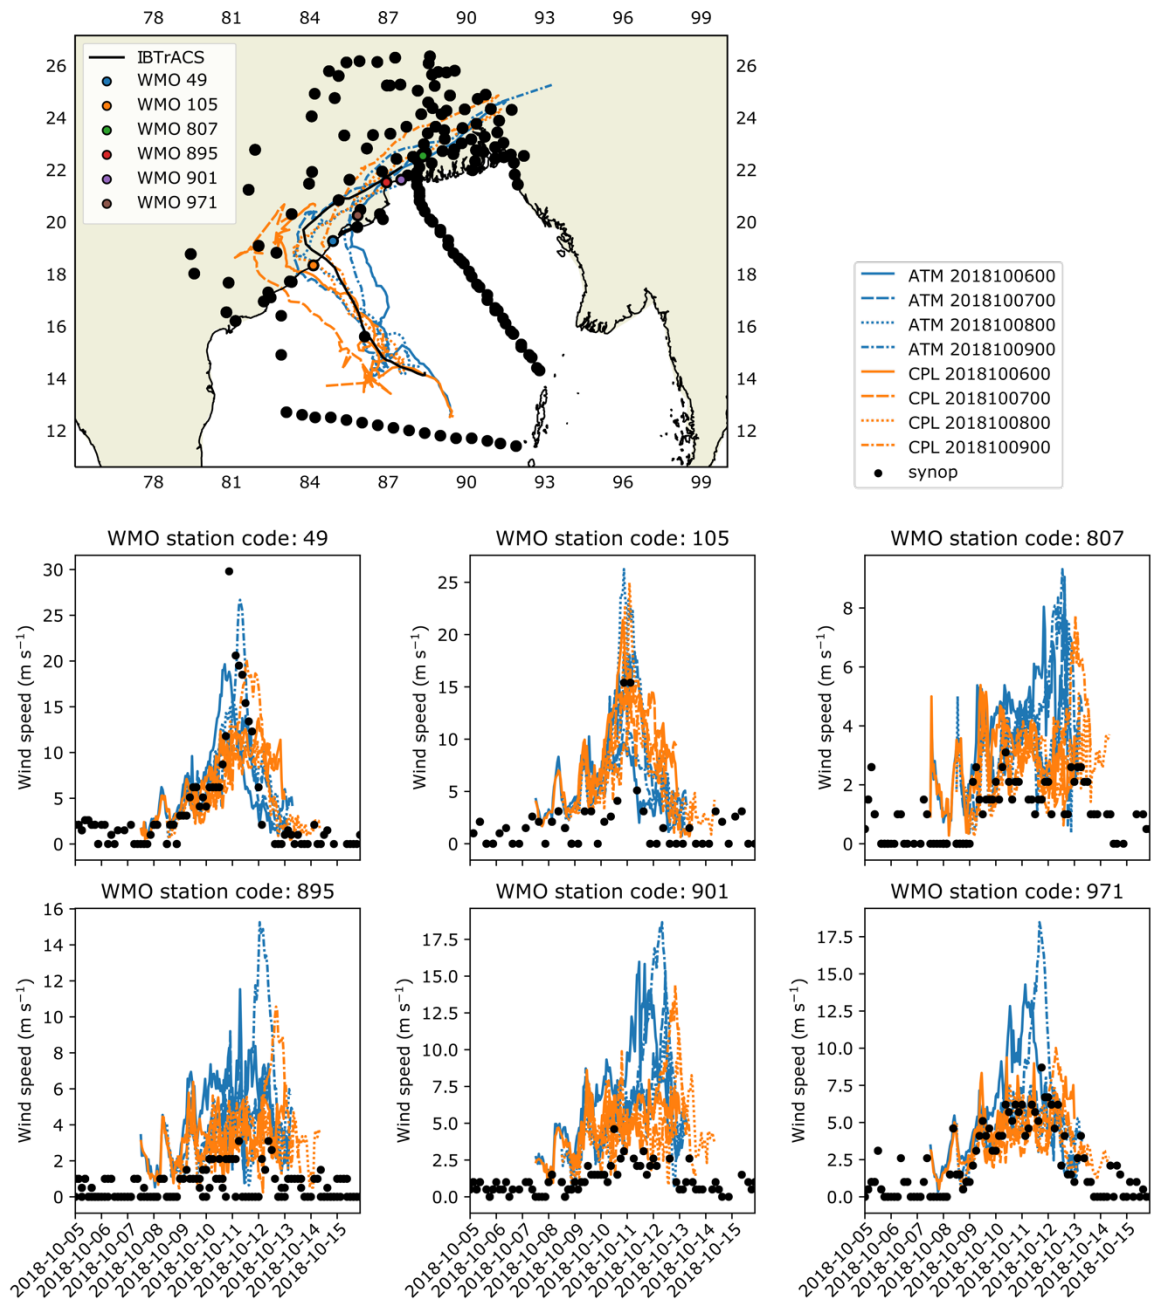

**Figure S3.** Location of SYNOP stations within 500 km of the track of Titli, used to evaluate forecasts in this

15 study; timeseries data for selected land SYNOP stations (close to the track at point of storm landfall).

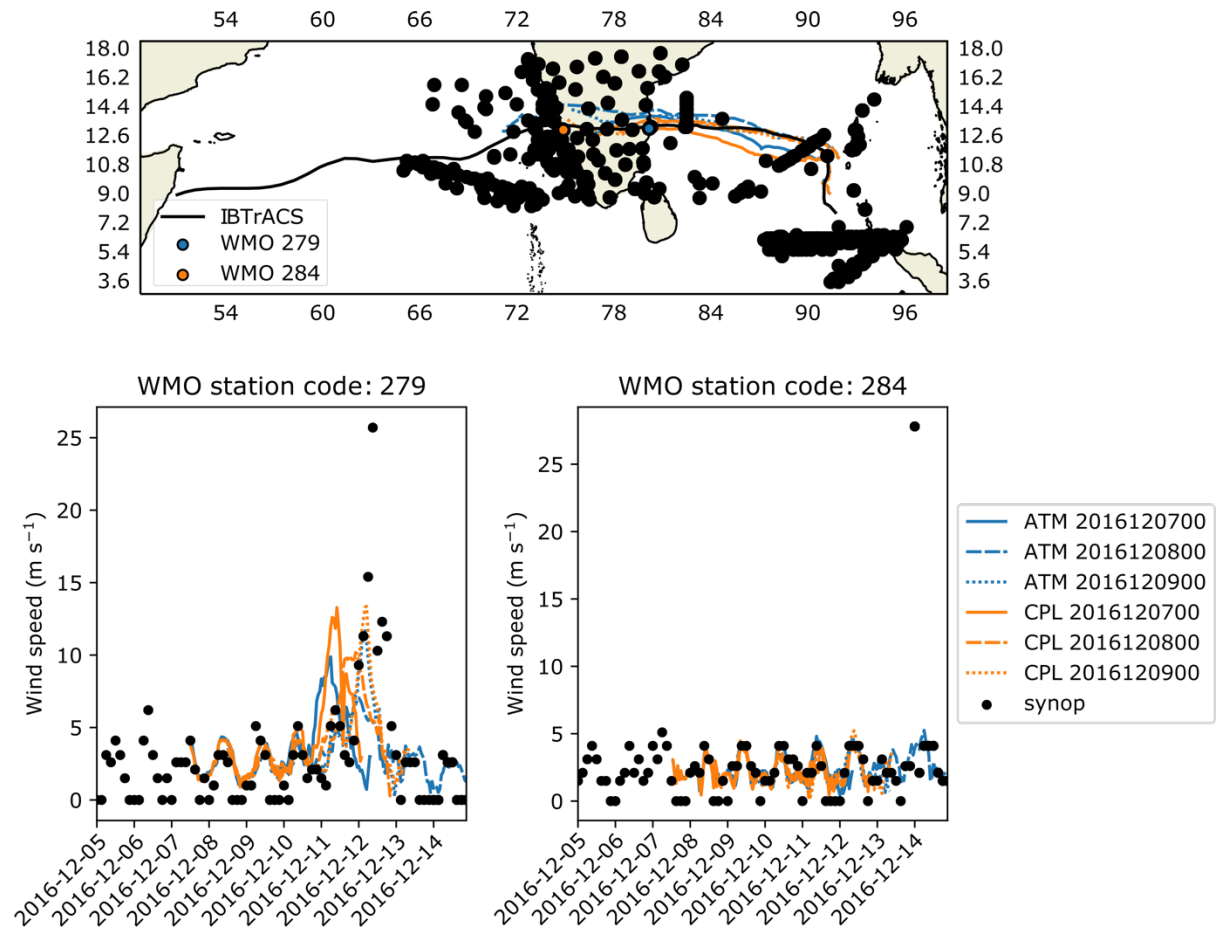

**Figure S4.** Location of SYNOP stations within 500 km of the track of Vardah, used to evaluate forecasts in this study; timeseries data for selected land SYNOP stations (close to the track at point of storm landfall).

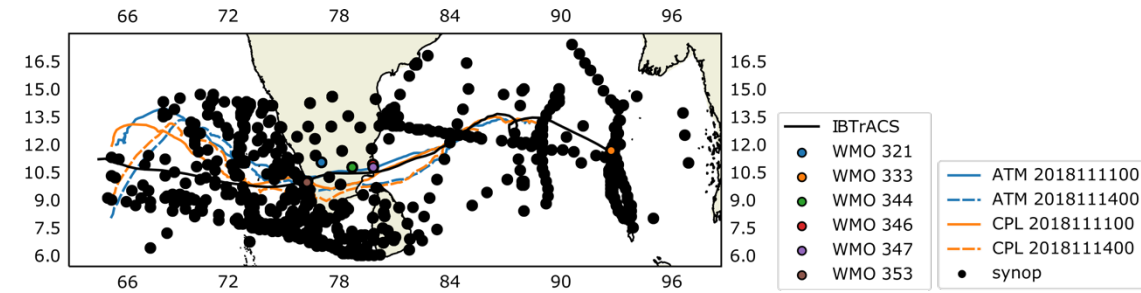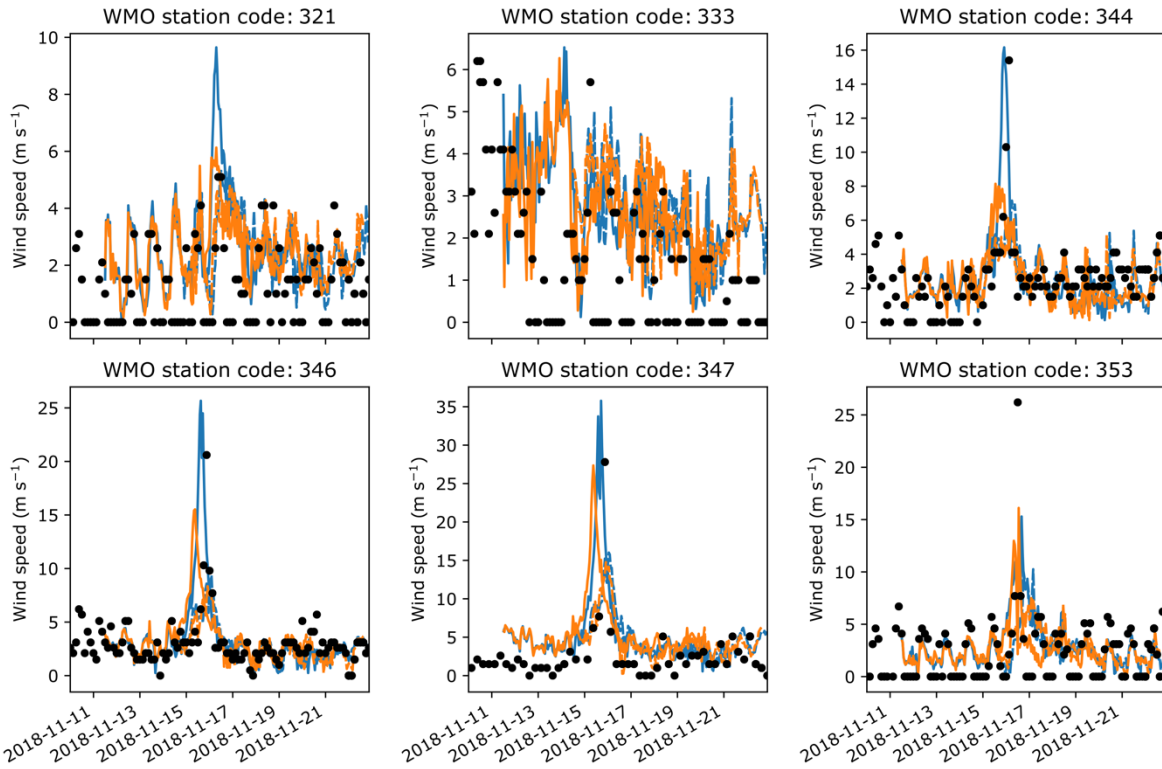

**Figure S5.** Location of SYNOP stations within 500 km of the track of TC Gaja, used to evaluate forecasts in this study; timeseries data for selected land SYNOP stations (close to the track at point of storm landfall).

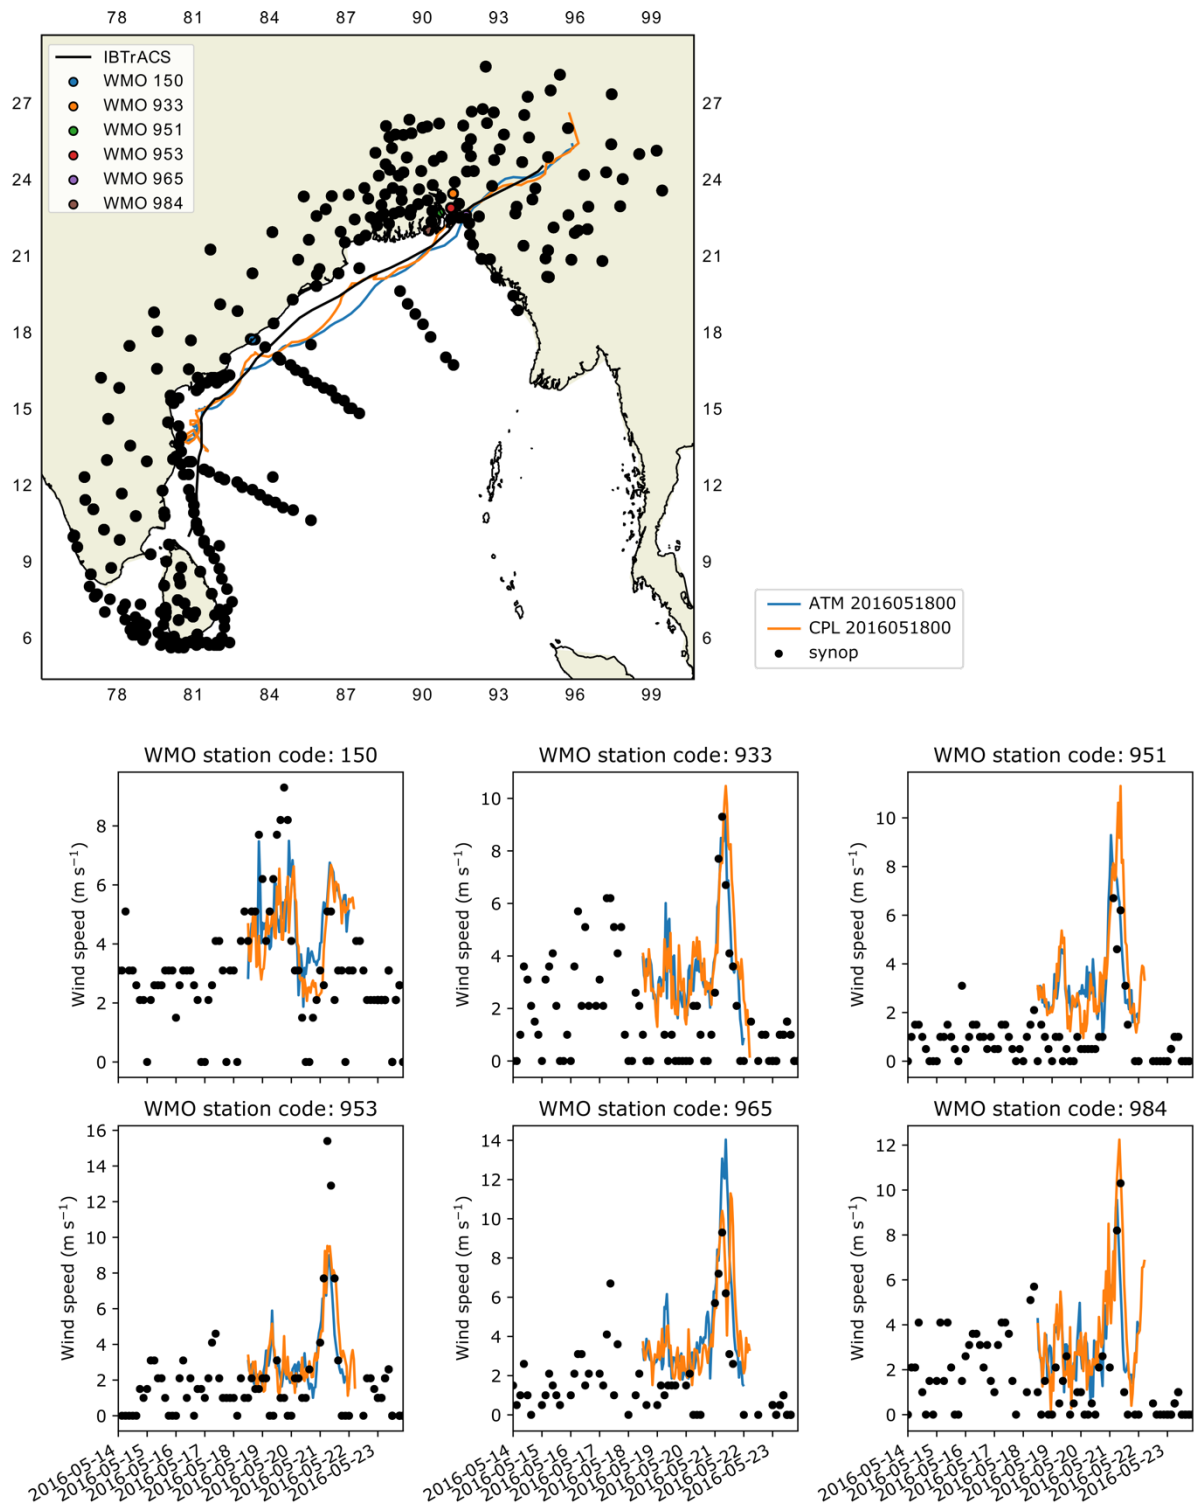

25 **Figure S6.** Location of SYNOP stations within 500 km of the track of tropical storm Roanu, used to evaluate forecasts in this study; timeseries data for selected land SYNOP stations (close to the track at point of storm landfall).

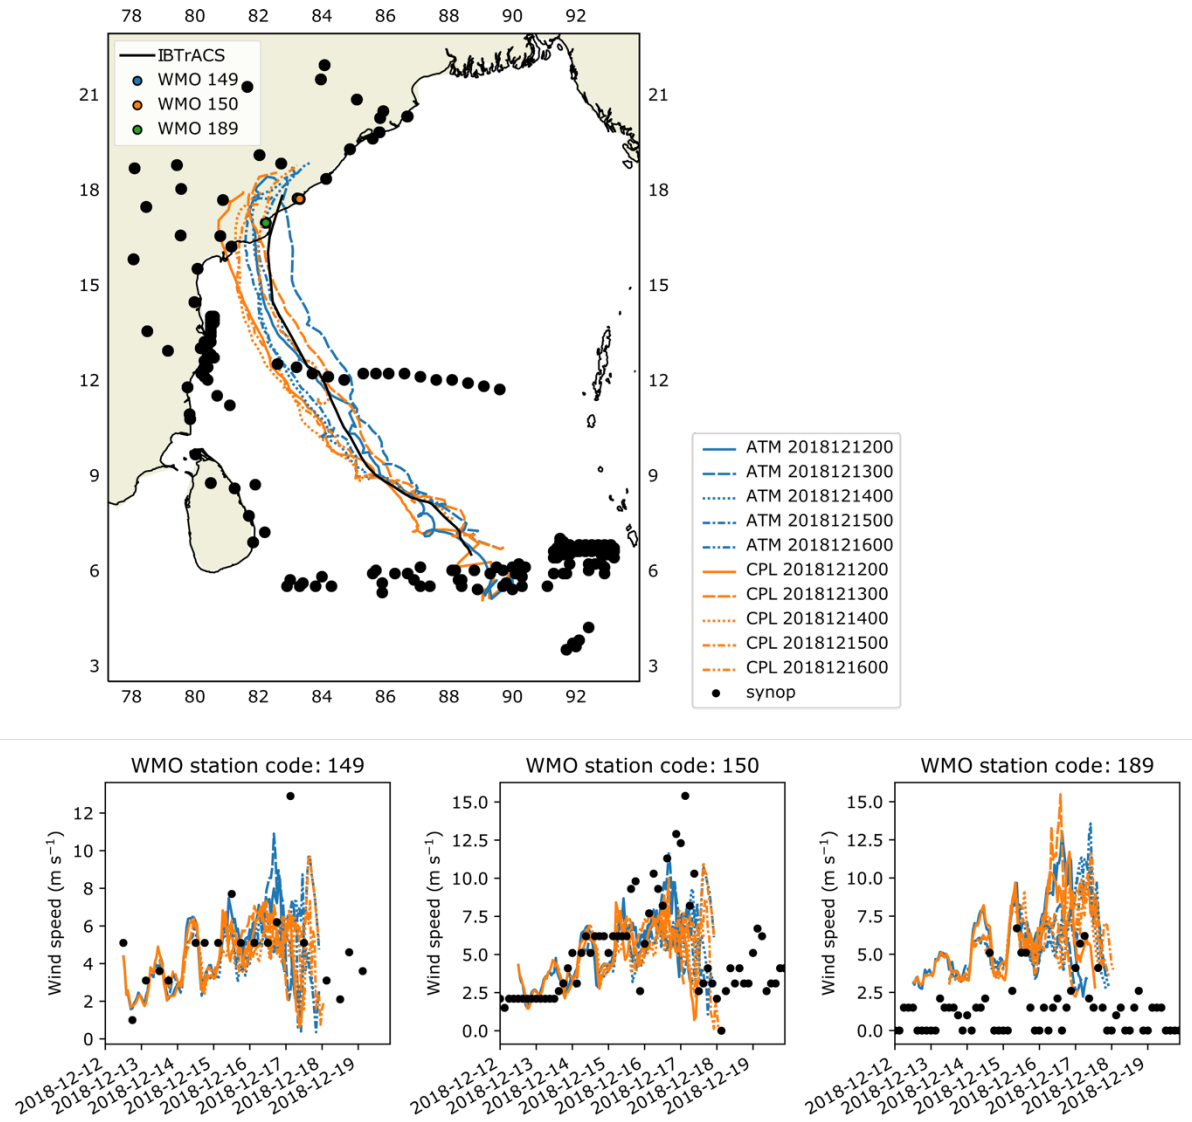

30 **Figure S7.** Location of SYNOP stations within 500 km of the track of tropical storm Phethai, used to evaluate forecasts in this study; timeseries data for selected land SYNOP stations (close to the track at point of storm landfall).



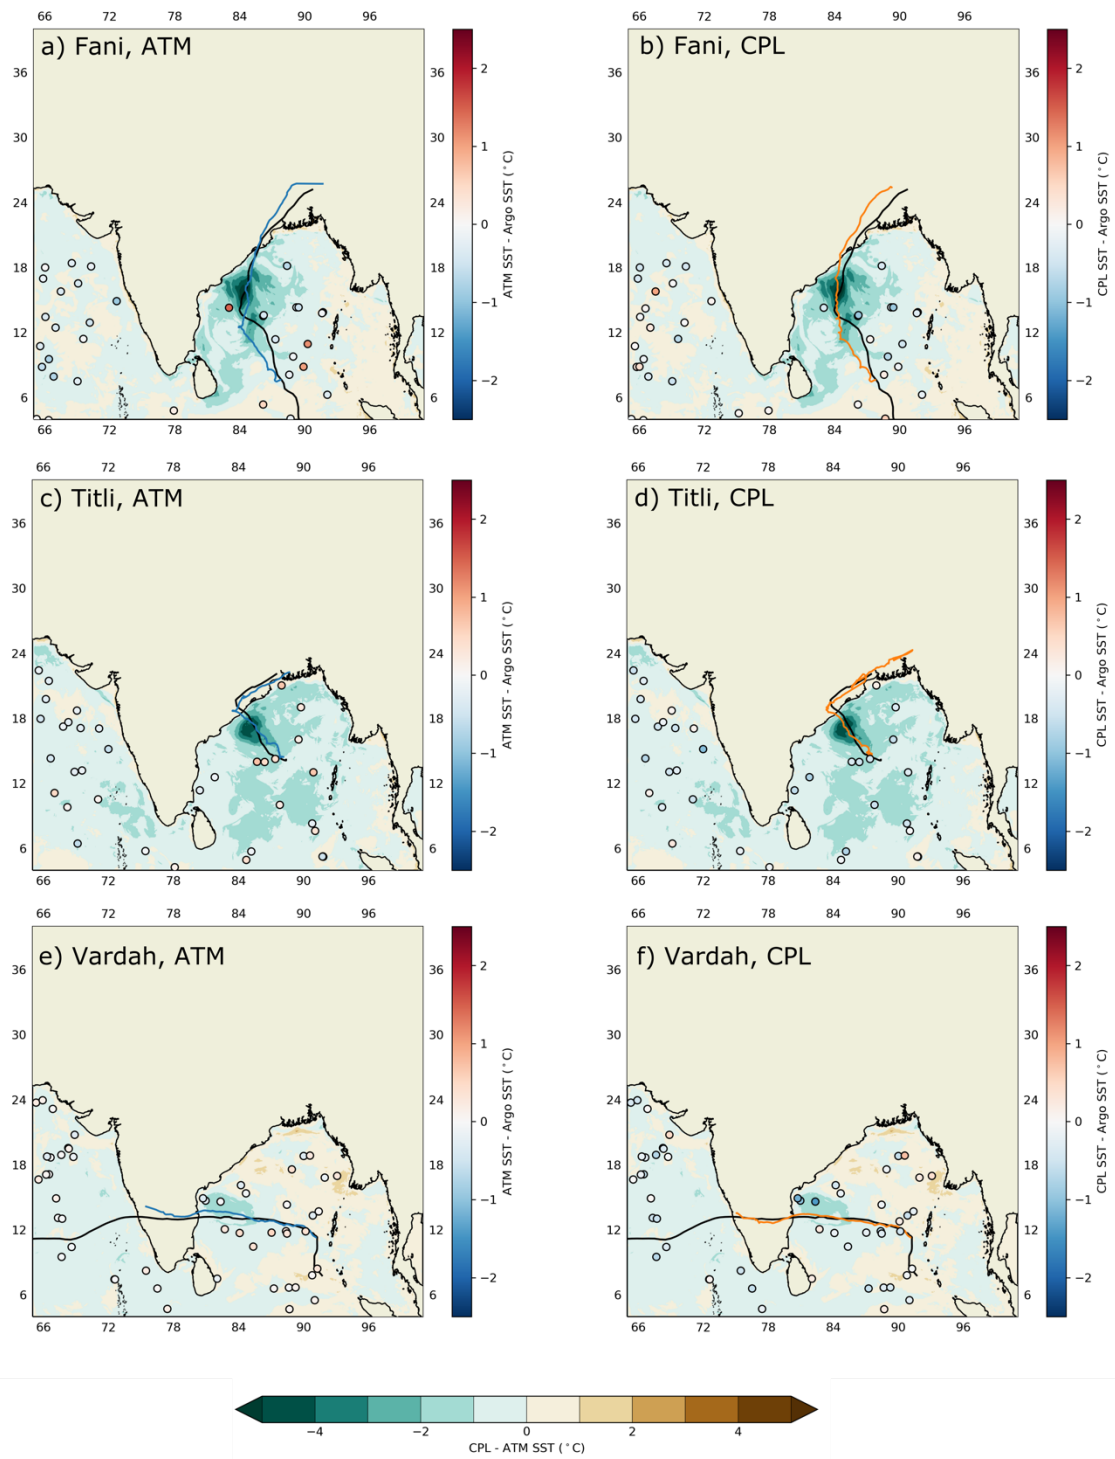

**Figure S8.** Difference in SST between CPL and ATM for forecasts with the best track in each lagged ensemble (Fani: 28/04/2019, Titli: 08/10/2018, Vardah: 09/12/2016); with locations of Argo floats used to assess these forecasts. Filled contours show CPL SST - ATM SST; circle colours show forecast SST - Argo float SST.



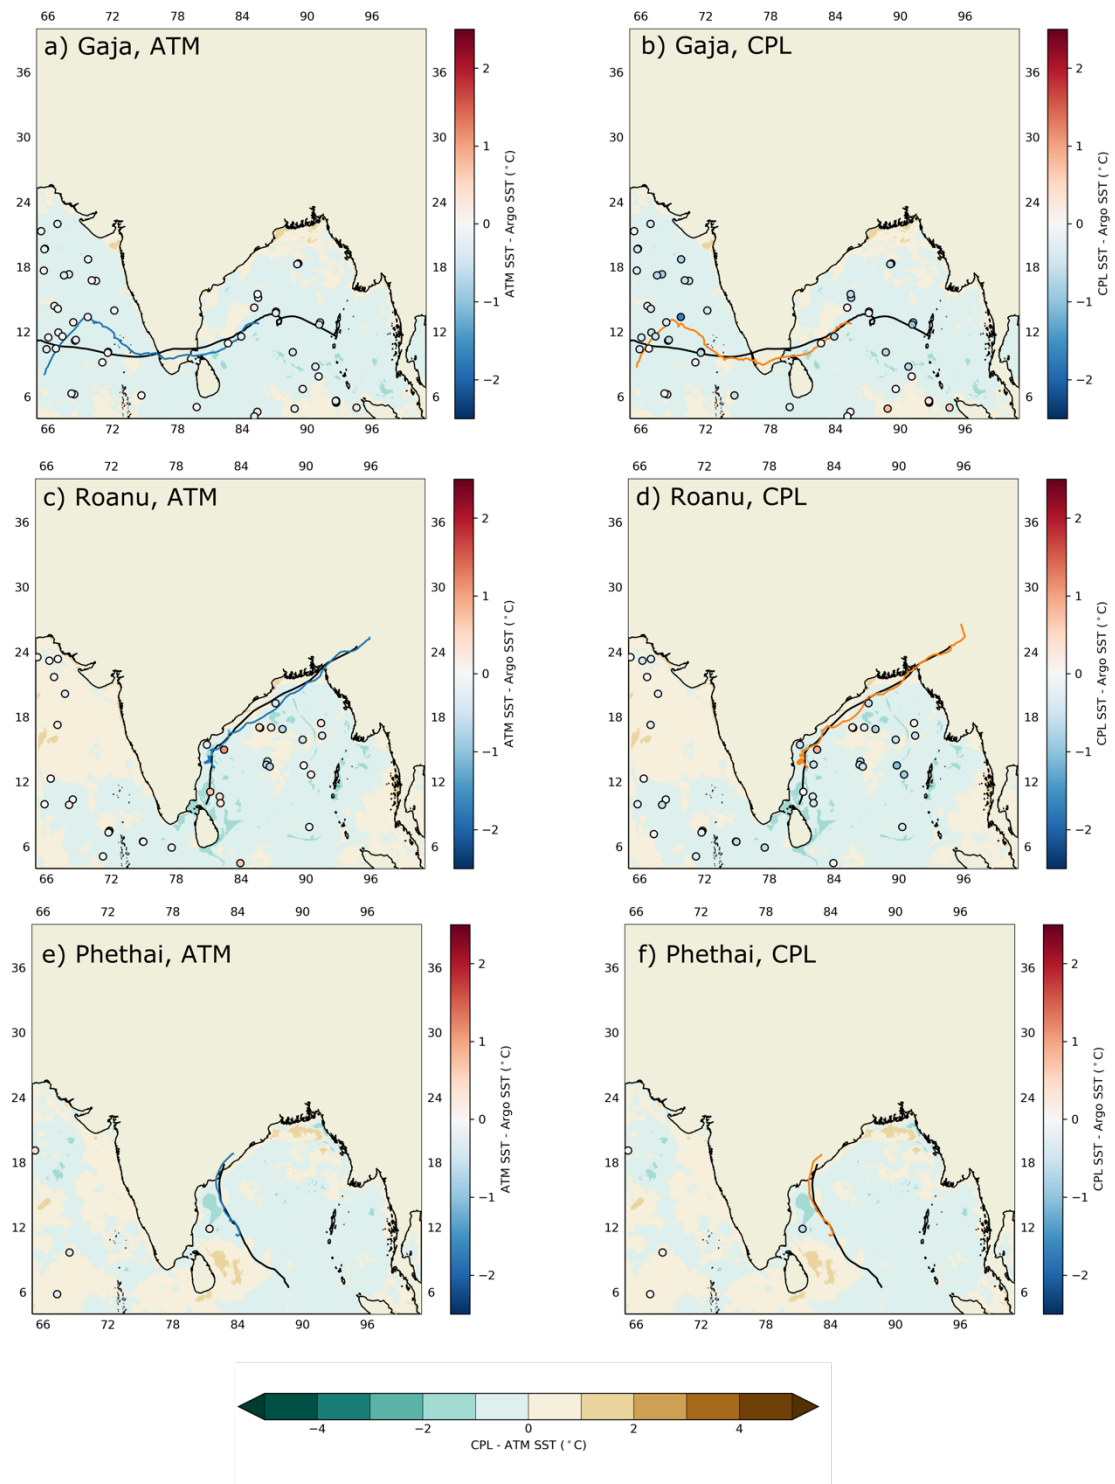

**Figure S9.** Difference in SST between CPL and ATM for forecasts with the best track in each lagged ensemble (Gaja: 14/11/2018, Roanu: 18/05/2016, Phethai: 16/12/2018); with locations of Argo floats used to assess these forecasts. Filled contours show CPL SST - ATM SST; circle colours show forecast SST - Argo float SST.

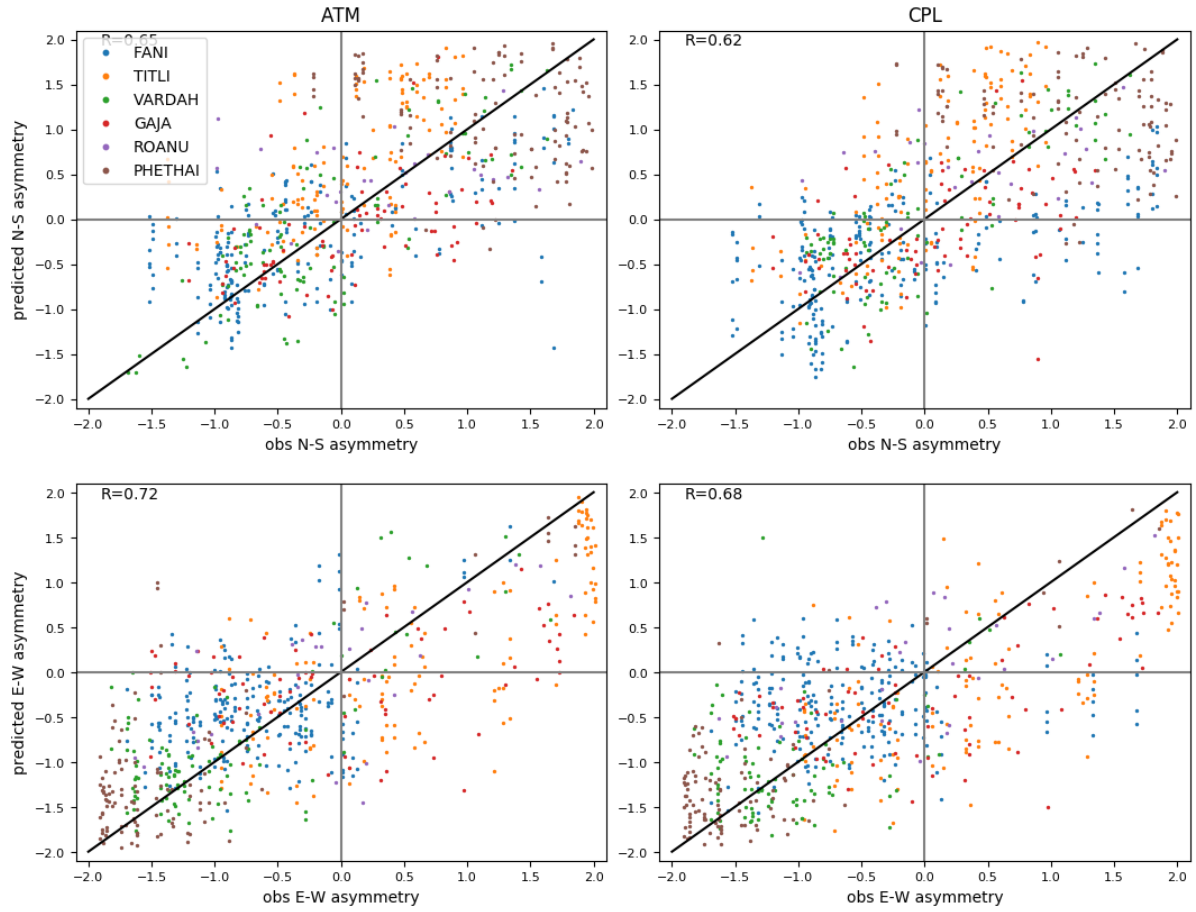

**Figure S10.** Predicted vs observed inner rain rate asymmetry for north minus south (top) and east minus west (bottom) and for ATM (left) and CPL (right). The black diagonal lines show the 1:1 relationship. Pearson correlation coefficients are given at the top of each panel. Forecasts with inaccurate tracks (marked with an asterisk in Table 2) are excluded.

**Table S1.** Summary of track error statistics for tropical cyclone simulations for ATM and CPL. Values in bold are those which are significantly less than the other model at the 95% confidence interval using a paired T-test (i.e., p value  $\leq 0.05$ ). All simulations are included in this analysis.

| Case study                           |     | Mean track error (km) | Landfall timing error (hr) | Landfall position error (km) | Mean MSLP absolute error (simulation-IBTrACS USA hPa) | Mean MSLP absolute error (simulation-IBTrACS New Delhi hPa) | Mean max wind absolute error (simulation-IBTrACS USA ms <sup>-1</sup> ) | Mean max wind absolute error (simulation-IBTrACS New Delhi ms <sup>-1</sup> ) |
|--------------------------------------|-----|-----------------------|----------------------------|------------------------------|-------------------------------------------------------|-------------------------------------------------------------|-------------------------------------------------------------------------|-------------------------------------------------------------------------------|
| Fani                                 | ATM | 161.3                 | 9.0                        | 202.6                        | 16.9                                                  | 14.0                                                        | 12.7                                                                    | 9.8                                                                           |
|                                      | CPL | <b>148.7</b>          | 4.8                        | 216.8                        | 17.5                                                  | 13.0                                                        | 13.4                                                                    | 10.1                                                                          |
| Titli                                | ATM | 129.8                 | 3.8                        | 118.5                        | <b>9.2</b>                                            | 9.9                                                         | <b>6.9</b>                                                              | 5.6                                                                           |
|                                      | CPL | 141.1                 | 5.2                        | 101.2                        | 12.2                                                  | <b>5.0</b>                                                  | 8.9                                                                     | 5.3                                                                           |
| Vardah                               | ATM | <b>344.7</b>          | 31.2                       | 117.5                        | 19.0                                                  | 21.2                                                        | 12.8                                                                    | 13.5                                                                          |
|                                      | CPL | 362.1                 | 28.8                       | <b>42.8</b>                  | <b>15.8</b>                                           | <b>17.4</b>                                                 | <b>11.3</b>                                                             | <b>12.2</b>                                                                   |
| Gaja                                 | ATM | <b>268.5</b>          | 10.8                       | 105.1                        | 19.0                                                  | 17.0                                                        | 11.5                                                                    | 11.1                                                                          |
|                                      | CPL | 286.6                 | 7.8                        | 144.7                        | <b>16.9</b>                                           | <b>13.6</b>                                                 | <b>10.7</b>                                                             | <b>9.5</b>                                                                    |
| Roanu                                | ATM | <b>153.9</b>          | 83.4                       | 1478.1                       | 7.4                                                   | 8.6                                                         | 4.9                                                                     | 6.9                                                                           |
|                                      | CPL | 191.4                 | 78.0                       | 1473.7                       | <b>6.4</b>                                            | <b>6.5</b>                                                  | 5.4                                                                     | <b>5.6</b>                                                                    |
| Phethai                              | ATM | <b>129.5</b>          | 9.6                        | <b>89.4</b>                  | 5.0                                                   | <b>5.9</b>                                                  | 6.1                                                                     | 7.1                                                                           |
|                                      | CPL | 137.8                 | 11.4                       | 148.7                        | 5.2                                                   | 6.4                                                         | 6.4                                                                     | 7.3                                                                           |
| Cat3+ storms (Fani, Titli)           | ATM | 150.1                 | 6.7                        | 165.2                        | <b>14.4</b>                                           | 12.5                                                        | <b>10.8</b>                                                             | 8.3                                                                           |
|                                      | CPL | 146.0                 | 5.0                        | 165.4                        | 15.8                                                  | <b>10.2</b>                                                 | 11.9                                                                    | 8.4                                                                           |
| N-ward storms (Fani, Titli, Phethai) | ATM | 144.8                 | 7.7                        | 138.1                        | <b>12.0</b>                                           | 10.8                                                        | <b>9.6</b>                                                              | 8.0                                                                           |
|                                      | CPL | 143.9                 | 7.3                        | 159.4                        | 13.0                                                  | <b>9.2</b>                                                  | 10.5                                                                    | 8.1                                                                           |
| W-ward storms (Vardah, Gaja)         | ATM | <b>303.4</b>          | 21.0                       | 111.3                        | 19.0                                                  | 18.9                                                        | 12.1                                                                    | 12.2                                                                          |
|                                      | CPL | 321.2                 | 18.3                       | 93.8                         | <b>16.3</b>                                           | <b>15.2</b>                                                 | <b>11.0</b>                                                             | <b>10.7</b>                                                                   |
| All storms except Roanu              | ATM | <b>221.8</b>          | 13.2                       | 126.9                        | 15.5                                                  | 14.7                                                        | 10.8                                                                    | 10.0                                                                          |
|                                      | CPL | 229.9                 | 11.9                       | 132.1                        | <b>14.7</b>                                           | <b>12.1</b>                                                 | 10.8                                                                    | <b>9.3</b>                                                                    |
| All storms                           | ATM | <b>215.3</b>          | 25.3                       | 359.9                        | 14.7                                                  | 14.1                                                        | 10.3                                                                    | 9.7                                                                           |
|                                      | CPL | 226.2                 | 23.3                       | 363.4                        | <b>13.9</b>                                           | <b>11.5</b>                                                 | 10.2                                                                    | <b>9.0</b>                                                                    |

**Table S2.** Summary of rain error statistics for tropical cyclone simulations for ATM and CPL. Values in bold are those which are significantly less than the other model at the 95% confidence interval using a paired T-test (i.e.,  $p$  value  $\leq 0.05$ ). Simulations with inaccurate tracks (marked with an asterisk in Table 2) are excluded.

| Case             |     | Rainrate absolute error (mm/hr) | N-S asymmetry mean absolute error | E-W asymmetry mean absolute error |
|------------------|-----|---------------------------------|-----------------------------------|-----------------------------------|
| All storms       | ATM | 1.8                             | <b>0.58</b>                       | 0.58                              |
|                  | CPL | <b>1.6</b>                      | 0.60                              | 0.61                              |
| All storms ocean | ATM | <b>1.6</b>                      | 0.56                              | 0.53                              |
|                  | CPL | 1.7                             | 0.56                              | 0.54                              |
| All storms land  | ATM | 2.2                             | <b>0.72</b>                       | <b>0.68</b>                       |
|                  | CPL | <b>1.2</b>                      | 0.85                              | 0.77                              |
